# Supplementary material for: Effects of Digital Device Ownership on Cognitive Decline in a Middle-Aged and Elderly Population: Longitudinal Observational Study
Source: PubMed Central journal article supplement (PMC6690159; doi:10.2196/14210), 2019-07-29
Supplement: jmir_v21i7e14210_app2.pdf [file jmir_v21i7e14210_app2.pdf]

Multimedia Appendix 2. Characteristics of the three groups of participants by digital device ownership

|                                            | No Desktop or<br>Cellphone<br>N=2598 | Desktop or<br>Cellphone Alone<br>N=8711 | Desktop and<br>Cellphone Both<br>N=2148 | Joint Test<br>P value |
|--------------------------------------------|--------------------------------------|-----------------------------------------|-----------------------------------------|-----------------------|
| Age, mean (SD)                             | 65.07 (9.27)                         | 57.58 (8.79)                            | 55.25 (8.14)                            | <0.001                |
| Male sex                                   | 1263 (48.6%)                         | 4321 (49.6%)                            | 1006 (46.8%)                            | 0.07                  |
| Educational level                          |                                      |                                         |                                         | <0.001                |
| Illiterate                                 | 1113 (42.8%)                         | 2013 (23.1%)                            | 214 (10.0%)                             |                       |
| Part of primary school                     | 550 (21.2%)                          | 1670 (19.2%)                            | 242 (11.3%)                             |                       |
| Primary school                             | 506 (19.5%)                          | 2080 (23.9%)                            | 351 (16.3%)                             |                       |
| Middle school                              | 303 (11.7%)                          | 1989 (22.8%)                            | 632 (29.4%)                             |                       |
| High school or above                       | 126 (4.8%)                           | 958 (11.0%)                             | 709 (33.0%)                             |                       |
| Marital status                             |                                      |                                         |                                         | <0.001                |
| Married or Partnered                       | 519 (20.0%)                          | 925 (10.6%)                             | 150 (7.0%)                              |                       |
| Otherwise                                  | 2079 (80.0%)                         | 7786 (89.4%)                            | 1998 (93.0%)                            |                       |
| Rural residence, mean (SD)                 | 0.68 (0.47)                          | 0.64 (0.48)                             | 0.26 (0.44)                             | <0.001                |
| Smoke                                      |                                      |                                         |                                         | 0.00                  |
| Current                                    | 812 (31.3%)                          | 2798 (32.1%)                            | 595 (27.7%)                             |                       |
| Former                                     | 252 (9.7%)                           | 807 (9.3%)                              | 178 (8.3%)                              |                       |
| Never                                      | 1533 (59.0%)                         | 5105 (58.6%)                            | 1375 (64.0%)                            |                       |
| Alcohol drink                              |                                      |                                         |                                         | 0.09                  |
| Current                                    | 809 (31.1%)                          | 2922 (33.6%)                            | 761 (35.4%)                             |                       |
| Former                                     | 251 (9.7%)                           | 747 (8.6%)                              | 142 (6.6%)                              |                       |
| Never                                      | 1538 (59.2%)                         | 5038 (57.9%)                            | 1245 (58.0%)                            |                       |
| Ever had high blood pressure,<br>mean (SD) | 0.31 (0.46)                          | 0.26 (0.44)                             | 0.27 (0.44)                             | <0.001                |
| Ever had diabetes, mean (SD)               | 0.07 (0.25)                          | 0.06 (0.24)                             | 0.08 (0.27)                             | 0.01                  |
| Ever had stroke, mean (SD)                 | 0.03 (0.17)                          | 0.03 (0.16)                             | 0.02 (0.14)                             | 0.07                  |
