# Supplementary material for: Effects of Digital Device Ownership on Cognitive Decline in a Middle-Aged and Elderly Population: Longitudinal Observational Study
Source: PubMed Central journal article supplement (PMC6690159; doi:10.2196/14210), 2019-07-29
Supplement: jmir_v21i7e14210_app3.pdf [file jmir_v21i7e14210_app3.pdf]

Multimedia Appendix 3. Adjusted association between digital device ownership and cognitive function by gender

| <i>Panel A. Independent Effect of Desktop</i>         | Coefficients (95% CI) | <i>P</i> value | n     |
|-------------------------------------------------------|-----------------------|----------------|-------|
| <b>Baseline difference</b>                            |                       |                |       |
| Male                                                  | 0.11 (0.06, 0.15)     | <.001          | 16730 |
| Female                                                | 0.11 (0.06, 0.15)     | <.001          | 17226 |
| <b>Longitudinal protective association in 2 years</b> |                       |                |       |
| Male                                                  | 0.01 (-0.05, 0.06)    | .80            | 16730 |
| Female                                                | 0.03 (-0.02, 0.08)    | .20            | 17226 |
| <b>Longitudinal protective association in 4 years</b> |                       |                |       |
| Male                                                  | 0.03 (-0.05, 0.06)    | .31            | 16730 |
| Female                                                | 0.08 (0.03, 0.13)     | .002           | 17226 |
| <i>Panel B. Independent Effect of Cellphone</i>       | Coefficients (95% CI) | <i>P</i> value | n     |
| <b>Baseline difference</b>                            |                       |                |       |
| Male                                                  | 0.11 (0.06, 0.15)     | <.001          | 16730 |
| Female                                                | 0.10 (0.06, 0.15)     | <.001          | 17226 |
| <b>Longitudinal protective association in 2 years</b> |                       |                |       |
| Male                                                  | 0.02 (-0.03, 0.07)    | .50            | 16730 |
| Female                                                | 0.00 (-0.05, 0.05)    | .95            | 17226 |
| <b>Longitudinal protective association in 4 years</b> |                       |                |       |
| Male                                                  | 0.05 (0.00, 0.10)     | .04            | 16730 |
| Female                                                | 0.07 (0.02, 0.12)     | .003           | 17226 |

Notes: adjusted for demographic (age, education, marriage, rural or urban residence) and health behavior (smoke, drink) as well as health condition risk factors (self-reported hypertension, diabetes, and stroke).
