# Supplementary material for: Effects of Digital Device Ownership on Cognitive Decline in a Middle-Aged and Elderly Population: Longitudinal Observational Study
Source: PubMed Central journal article supplement (PMC6690159; doi:10.2196/14210), 2019-07-29
Supplement: jmir_v21i7e14210_app4.pdf [file jmir_v21i7e14210_app4.pdf]

Multimedia Appendix 4. Adjusted association between digital device ownership and cognitive function by age

| <i>Panel A. Independent Effect of Desktop</i>         | Coefficients (95% CI) | <i>P</i> value | n     |
|-------------------------------------------------------|-----------------------|----------------|-------|
| <b>Baseline difference</b>                            |                       |                |       |
| Aged 45 and 64                                        | 0.12 (0.08, 0.15)     | <.001          | 25925 |
| Aged 65 and above                                     | 0.17 (0.08,0.25)      | <.001          | 8031  |
| <b>Longitudinal protective association in 2 years</b> |                       |                |       |
| Aged 45 and 64                                        | 0.02 (-0.02, 0.06)    | .31            | 25925 |
| Aged 65 and above                                     | 0.00 (-0.10, 0.09)    | .91            | 8031  |
| <b>Longitudinal protective association in 4 years</b> |                       |                |       |
| Aged 45 and 64                                        | 0.05 (0.01, 0.08)     | .03            | 25925 |
| Aged 65 and above                                     | -0.01 (-0.12, 0.08)   | .77            | 8031  |
| <i>Panel B. Independent Effect of Cellphone</i>       | Coefficients (95% CI) | <i>P</i> value | n     |
| <b>Baseline difference</b>                            |                       |                |       |
| Aged 45 and 64                                        | 0.11 (0.07, 0.15)     | <.001          | 25925 |
| Aged 65 and above                                     | 0.10 (0.06, 0.16)     | <.001          | 8031  |
| <b>Longitudinal protective association in 2 years</b> |                       |                |       |
| Aged 45 and 64                                        | -0.02 (-0.06, 0.03)   | .42            | 25925 |
| Aged 65 and above                                     | 0.01 (-0.04, 0.07)    | .62            | 8031  |
| <b>Longitudinal protective association in 4 years</b> |                       |                |       |
| Aged 45 and 64                                        | 0.02 (-0.03, 0.06)    | .43            | 25925 |
| Aged 65 and above                                     | 0.02 (-0.04, 0.08)    | .60            | 8031  |

Notes: adjusted for demographic (sex, education, marriage, rural or urban residence) and health behavior (smoke, drink) as well as health condition risk factors (self-reported hypertension, diabetes, and stroke).
