# Supplementary material for: Effects of Digital Device Ownership on Cognitive Decline in a Middle-Aged and Elderly Population: Longitudinal Observational Study
Source: PubMed Central journal article supplement (PMC6690159; doi:10.2196/14210), 2019-07-29
Supplement: jmir_v21i7e14210_app5.pdf [file jmir_v21i7e14210_app5.pdf]

Multimedia Appendix 5. Sensitivity analyses restricted analytic cohorts to those participated in all survey waves

| <b><i>Panel A. Desktop Ownership</i></b>   | Without Desktop         | With Desktop            | P     |
|--------------------------------------------|-------------------------|-------------------------|-------|
| Baseline difference<br>(95% CI)            | reference               | 0.11<br>(0.07, 0.15)    | <.001 |
| Changes in 2 years<br>(95% CI)             | -0.03<br>(-0.04, -0.01) | -0.01<br>(-0.05, 0.02)  | .50   |
| Changes in 4 years<br>(95% CI)             | -0.16<br>(-0.18, -0.15) | -0.10<br>(-0.14, -0.06) | .002  |
| Number of Observations                     | 29727                   |                         |       |
| <b><i>Panel B. Cellphone Ownership</i></b> | Without Cellphone       | With Cellphone          | P     |
| Baseline difference<br>(95% CI)            | reference               | 0.10<br>(0.07, 0.13)    | <.001 |
| Changes in 2 years<br>(95% CI)             | -0.03<br>(-0.06, 0.00)  | -0.02<br>(-0.04, -0.01) | .82   |
| Changes in 4 years<br>(95% CI)             | -0.20<br>(-0.24, -0.17) | -0.14<br>(-0.16, -0.12) | <.001 |
| Number of Observations                     | 29727                   |                         |       |

Notes: adjusted for demographic (age, sex, education, marriage, rural or urban residence) and health behavior (smoke, drink) as well as health condition risk factors (self-reported hypertension, diabetes, and stroke).
